# Supplementary material
Source: PubMed Central journal article supplement (PMC9236554)
Supplement: NIHMS1816389-supplement-1.pdf [file NIHMS1816389-supplement-1.pdf]

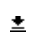

**Supplementary Table 1.** Key characteristics of healthy kid's meal policies: Location, bill number, title, jurisdiction, rulemaking body, type, preemptive language, vote, and key dates

| Location                      | Legislative Bill | Title                                                                                                                                                                                                        | Jurisdiction | Rulemaking Body        | Type of Policy   | Preemptive Language Used | Vote: Favor- Oppose- Absent- Abstain | Enactment Date | Effective Date |
|-------------------------------|------------------|--------------------------------------------------------------------------------------------------------------------------------------------------------------------------------------------------------------|--------------|------------------------|------------------|--------------------------|--------------------------------------|----------------|----------------|
| Cleveland, OH <sup>a</sup>    | ORD 524-2020     | An Emergency Ordinance to Supplement the Codified Ordinances of Cleveland, Ohio, 1976, by Enacting New Section 241.43 Relating to Sale of Beverages Offered with Children's Meals by Food Service Operations | City         | City Health Department | Default Beverage | NA                       | 14-0-2-1                             | 07/29/2020     | 01/29/2021     |
| Philadelphia, PA <sup>b</sup> | ORD 190505       | Amending Title 6 of the Philadelphia Code, Entitled "Health Code," by Adding A New Chapter 6-311, Entitled "Children's Meals at Food Service Establishments"                                                 | City         | City Board of Health   | Default Beverage | NA                       | 16-0-0-0                             | 10/02/2019     | 04/01/2020     |

|                       |       |                                                                                                              |       |                         |                  |    |           |            |            |
|-----------------------|-------|--------------------------------------------------------------------------------------------------------------|-------|-------------------------|------------------|----|-----------|------------|------------|
| Delaware <sup>c</sup> | HB79  | An Act to Amend Title 16 of the Delaware Code Regarding Default Beverages in Children's Meals in Restaurants | State | State Health Department | Default Beverage | No | 28-11-2-0 | 07/17/2019 | 07/17/2020 |
| Hawaii <sup>d</sup>   | SB549 | A Bill for an Act Relating to Healthy Beverages for Children                                                 | State | State Health Department | Default Beverage | No | 24-1-0-0  | 06/28/2019 | 01/01/2020 |

|                                |            |                                                                                                                                            |      |                                            |                  |    |          |            |            |
|--------------------------------|------------|--------------------------------------------------------------------------------------------------------------------------------------------|------|--------------------------------------------|------------------|----|----------|------------|------------|
| New York City, NY <sup>e</sup> | ORD 1064-B | A Local Law to Amend the Administrative Code of the City of New York, in Relation to Selections for Beverages Included in Children's Meals | City | City Health Department                     | Default Beverage | NA | 43-4-3-0 | 04/28/2019 | 05/01/2020 |
| Wilmington, DE <sup>f</sup>    | ORD 18-046 | An Ordinance to Amend Chapter 5 of the City Code Regarding Beverages Offered in Children's Meals                                           | City | City Department of Licenses and Inspection | Default Beverage | NA | 10-0-3-0 | 10/08/2018 | 01/06/2019 |

|                             |                      |                                                                                                                                                                                                  |       |                         |                                         |     |           |            |            |
|-----------------------------|----------------------|--------------------------------------------------------------------------------------------------------------------------------------------------------------------------------------------------|-------|-------------------------|-----------------------------------------|-----|-----------|------------|------------|
| California <sup>g</sup>     | SB1192               | An Act to Add Chapter 12.8 (Commencing with Section 114379) to Part 7 of Division 104 of the Health and Safety Code, Relating to Children's Health                                               | State | State Health Department | Default Beverage                        | Yes | 29-9-0-2  | 09/20/18   | 01/01/2019 |
| Louisville, KY <sup>h</sup> | O-064-18             | An Ordinance Amending Chapter 118 of the Louisville Metro Code of Ordinances Regarding Establishing the Nutrition Requirements and Default Beverages Offered with Children's Meals (as Amended.) | City  | City Board of Health    | Nutritional Standards, Default Beverage | NA  | 13-11-1-1 | 06/07/2018 | 10/05/2018 |
| Baltimore, MD <sup>i</sup>  | COUNCIL BILL 17-0152 | An Ordinance Concerning Food Service Facilities - Healthy Beverages for Children's Meals                                                                                                         | City  | City Health Department  | Default Beverage                        | NA  | 7-0-0-0   | 04/19/2018 | 07/18/2018 |

|                                 |             |                                                                                                                                                                                                                                 |      |                        |                  |    |         |            |            |
|---------------------------------|-------------|---------------------------------------------------------------------------------------------------------------------------------------------------------------------------------------------------------------------------------|------|------------------------|------------------|----|---------|------------|------------|
| Daly City, CA <sup>j</sup>      | ORD 1415    | An Ordinance of the City Council of the City of Daly City Adding Chapter 8.72 to Title 8 of the Daly City Municipal Code Re: Establishing Healthy Default Beverages Offered with Children's Meals                               | City | City Council           | Default Beverage | NA | 5-0-0-0 | 01/08/2018 | 06/01/2018 |
| Long Beach, CA <sup>k</sup>     | ORD-17-0027 | An Ordinance of the City Council of the City of Long Beach Amending the Long Beach Municipal Code by Adding Chapter 8.17 Relating to Default Beverages Offered with Children's Meals                                            | City | City Health Department | Default Beverage | NA | 7-0-2-0 | 11/16/2017 | 12/17/2017 |
| Cathedral City, CA <sup>l</sup> | ORD 803     | An Ordinance of the City Council of the City of Cathedral City California Adding Cathedral City Municipal Code Chapter 5.92 Requiring Healthy Beverages to be the Default Beverage Offering by Restaurants for Children's Meals | City | City Council           | Default Beverage | NA | 3-2-0-0 | 11/08/2017 | 12/08/2017 |
| Lafayette, CO <sup>m</sup>      | ORD 2017-40 | An Ordinance of the City Council of the City of Lafayette, Colorado, Enacting a New Article IX of Chapter 55                                                                                                                    | City | City Health Department | Default Beverage | NA | 6-1-0-0 | 10/17/2017 | 10/27/2017 |

|                                     |           |                                                                                                                                                                                                                                                              |        |                                               |                  |    |         |            |            |
|-------------------------------------|-----------|--------------------------------------------------------------------------------------------------------------------------------------------------------------------------------------------------------------------------------------------------------------|--------|-----------------------------------------------|------------------|----|---------|------------|------------|
|                                     |           | Establishing the Default Beverages Offered with Children's Meals within the City of Lafayette, Colorado                                                                                                                                                      |        |                                               |                  |    |         |            |            |
| Santa Clara County, CA <sup>n</sup> | NS300.908 | An Ordinance of the Board of Supervisors of the County of Santa Clara Renaming Chapter XXII and Amending and Adding Sections to Chapter XXII of Division A18 of the Santa Clara County Ordinance Code Relating to Beverages in Restaurant Meals for Children | County | Local Board of Supervisors                    | Default Beverage | NA | 4-0-0-1 | 05/09/2017 | 08/07/2017 |
| Berkeley, CA <sup>o</sup>           | ORD 7560  | Healthy Default Beverages Offered with Children's Meals; Adding Berkeley Municipal Code Chapter 12.72                                                                                                                                                        | City   | City Council                                  | Default Beverage | NA | 9-0-0-0 | 07/18/2017 | 07/01/2017 |
| Perris, CA <sup>p</sup>             | ORD 1340  | An Ordinance of the City Council of the City of Perris, County of Riverside, State of California, Adding Chapter 7.46 to Title 7 of the Perris Municipal Code Establishing Default Beverages Offered in Children's Meals                                     | City   | Live Well! Initiative from the City of Perris | Default Beverage | NA | 5-0-0-0 | 03/14/2017 | 04/14/2017 |

|                                     |                     |                                                                                                                                                                                                                        |        |                                |                  |    |         |            |            |
|-------------------------------------|---------------------|------------------------------------------------------------------------------------------------------------------------------------------------------------------------------------------------------------------------|--------|--------------------------------|------------------|----|---------|------------|------------|
| Stockton, CA <sup>g</sup>           | ORD 2016-06-07-1502 | An Ordinance Amending Stockton Municipal Code Title 5 by Adding Chapter 5.70 Regarding Establishing the Default Beverages Offered with Children's Meals                                                                | City   | City Council                   | Default Beverage | NA | 7-0-0-0 | 06/07/2016 | 07/07/2016 |
| Davis, CA <sup>f</sup>              | ORD 2451            | Ordinance of the City Council of the City of Davis Adding Article 17.02 To Chapter 17 of the Davis Municipal Code Establishing Default Beverages Offered with Children's Meals                                         | City   | Davis Housing & Human Services | Default Beverage | NA | 5-0-0-0 | 06/02/2015 | 07/02/2015 |
| San Francisco, CA <sup>s</sup>      | ORD 290-10          | Ordinance Amending Article 8 of the San Francisco Health Code by Adding Sections 471.1 through 471.9, to Set Nutritional Standards for Restaurant Food Sold Accompanied by Toys or Other Youth Focused Incentive Items | County | Local Board of Supervisors     | Toy              | NA | 8-3-0-0 | 11/23/2010 | 12/01/2011 |
| Santa Clara County, CA <sup>t</sup> | NS300.820           | An Ordinance of the Board of Supervisors of the County of Santa Clara Adding Chapter XXII of Division A18 to the County of Santa Clara Ordinance Code Relating to Toys and Other Incentives with Restaurant Food       | County | Local Board of Supervisors     | Toy              | NA | 3-2-0-0 | 05/11/2010 | 08/11/2010 |

<sup>a</sup> An Emergency Ordinance to Supplement the Codified Ordinances of Cleveland, Ohio, 1976, by Enacting New Section 241.43 Relating to Sale of Beverages Offered with Children's Meals by Food Service Operations. July 29, 2020. Available at <https://bit.ly/3yxhWq5>. Accessed August 1, 2020.

- <sup>b</sup> Amending Title 6 of the Philadelphia Code, Entitled "Health Code," by Adding A New Chapter 6-311, Entitled "Children's Meals at Food Service Establishments". October 2, 2019. Available at <https://bit.ly/2WGqZIk>. Accessed August 1, 2020.
- <sup>c</sup> An Act to Amend Title 16 of the Delaware Code Regarding Default Beverages in Children's Meals in Restaurants. July 17, 2019. Available at <https://legis.delaware.gov/BillDetail/47551>. Accessed August 1, 2020.
- <sup>d</sup> A Bill for an Act Relating to Healthy Beverages for Children. June 28, 2019. Available at <https://bit.ly/3jx837z>. Accessed August 1, 2020.
- <sup>e</sup> A Local Law to Amend the Administrative Code of the City of New York, in Relation to Selections for Beverages Included in Children's Meals. April 28, 2019. Available at <https://on.nyc.gov/3zMyOyh>. Accessed August 1, 2020.
- <sup>f</sup> An Ordinance to Amend Chapter 5 of the City Code Regarding Beverages Offered in Children's Meals. October 8, 2018. Available at <https://bit.ly/3BsmIXJ>. Accessed August 1, 2020.
- <sup>g</sup> An Act to Add Chapter 12.8 (Commencing with Section 114379) to Part 7 of Division 104 of the Health and Safety Code, Relating to Children's Health. September 20, 2018. Available at <https://bit.ly/3jvOSLa>. Accessed August 1, 2020.
- <sup>h</sup> An Ordinance Amending Chapter 118 of the Louisville Metro Code of Ordinances Regarding Establishing the Nutrition Requirements and Default Beverages Offered with Children's Meals (as Amended). June 7, 2018. Available at <https://bit.ly/2WHZO7J>. Accessed August 1, 2020.
- <sup>i</sup> An Ordinance Concerning Food Service Facilities - Healthy Beverages for Children's Meals. April 19, 2018. Available at <https://bit.ly/3DsgN6K>. Accessed August 1, 2020.
- <sup>j</sup> An Ordinance of the City Council of the City of Daly City Adding Chapter 8.72 to Title 8 of the Daly City Municipal Code Re: Establishing Healthy Default Beverages Offered with Children's Meals. January 8, 2018. Available at <https://bit.ly/3BtihMb>. Accessed August 1, 2020.
- <sup>k</sup> An Ordinance of the City Council of the City of Long Beach Amending the Long Beach Municipal Code by Adding Chapter 8.17 Relating to Default Beverages Offered with Children's Meals. November 16, 2017. Available at <https://bit.ly/38rpUXh>. Accessed August 1, 2020.
- <sup>l</sup> An Ordinance of the City Council of the City of Cathedral City California Adding Cathedral City Municipal Code Chapter 5.92 Requiring Healthy Beverages to be the Default Beverage Offering by Restaurants for Children's Meals. November 8, 2017. Available at <https://bit.ly/3jvPHne>. Accessed August 1, 2020.
- <sup>m</sup> An Ordinance of the City Council of the City of Lafayette, Colorado, Enacting a New Article IX of Chapter 55 Establishing the Default Beverages Offered with Children's Meals within the City of Lafayette, Colorado. October 17, 2017. Available at <https://bit.ly/3BsR8sP>. Accessed August 1, 2020.
- <sup>n</sup> An Ordinance of the Board of Supervisors of the County of Santa Clara Renaming Chapter XXII and Amending and Adding Sections to Chapter XXII of Division A18 of the Santa Clara County Ordinance Code Relating to Beverages in Restaurant Meals for Children. May 9, 2017. Available at <https://bit.ly/3kGb9p3>. Accessed August 1, 2020.
- <sup>o</sup> Healthy Default Beverages Offered with Children's Meals; Adding Berkeley Municipal Code Chapter 12.72. June 27, 2017. Available at <https://bit.ly/3DxCpyL>. Accessed August 1, 2020.
- <sup>p</sup> An Ordinance of the City Council of the City of Perris, County of Riverside, State of California, Adding Chapter 7.46 to Title 7 of the Perris Municipal Code Establishing Default Beverages Offered in Children's Meals. March 14, 2017. Available at <https://bit.ly/3zALi8a>. Accessed August 1, 2020.
- <sup>q</sup> An Ordinance Amending Stockton Municipal Code Title 5 by Adding Chapter 5.70 Regarding Establishing the Default Beverages Offered with Children's Meals. June 7, 2016. Available at <https://bit.ly/3kYzg2D>. Accessed August 1, 2020.
- <sup>r</sup> Ordinance of the City Council of the City of Davis Adding Article 17.02 To Chapter 17 of the Davis Municipal Code Establishing Default Beverages Offered with Children's Meals. June 2, 2015. Available at <https://bit.ly/3kKsEo3>. Accessed August 1, 2020.
- <sup>s</sup> Ordinance Amending Article 8 of the San Francisco Health Code by Adding Sections 471.1 through 471.9, to Set Nutritional Standards for Restaurant Food Sold Accompanied by Toys or Other Youth Focused Incentive Items. November 23, 2010. Available at <https://bit.ly/3BvInhH>. Accessed August 1, 2020.
- <sup>t</sup> An Ordinance of the Board of Supervisors of the County of Santa Clara Adding Chapter XXII of Division A18 to the County of Santa Clara Ordinance Code Relating to Toys and Other Incentives with Restaurant Food. May 11, 2010. Available at <https://bit.ly/3BA5IEx>. Accessed August 1, 2020.



**Supplementary Table 2.** Key characteristics of healthy kid's meal policies: political affiliation of legislators, fiscal note, policy note, enforcement agency, enforcement method, fine amount, communication of policy, technical assistance provided, and purpose

|                               | Political Affiliation of Bill Sponsor(s) | Political Affiliation of Local Government | Political Affiliation of Governor | Fiscal Note | Policy Note | Enforcement Agency     | Enforcement Method | Fine Amounts | Communication of Policy | Technical Assistance Provided | Purpose |
|-------------------------------|------------------------------------------|-------------------------------------------|-----------------------------------|-------------|-------------|------------------------|--------------------|--------------|-------------------------|-------------------------------|---------|
| <b>Location</b>               |                                          |                                           |                                   |             |             |                        |                    |              |                         |                               |         |
| Cleveland, OH <sup>a</sup>    | Nonpartisan                              | Democrat                                  | Republican                        | No          | No          | City Health Department | Inspections        | warning-\$50 | Yes                     | Yes                           | No      |
| Philadelphia, PA <sup>b</sup> | Democrat                                 | Democrat                                  | Democrat                          | No          | No          | City Health Department | Inspections        | \$250        | Yes                     | No                            | NA      |

|                                |          |          |          |     |    |                         |                    |                    |                    |    |    |
|--------------------------------|----------|----------|----------|-----|----|-------------------------|--------------------|--------------------|--------------------|----|----|
|                                |          |          |          |     |    |                         |                    |                    |                    |    |    |
| Delaware <sup>c</sup>          | Democrat | NA       | Democrat | No  | No | State Health Department | Inspections        | No                 | No fines           | No | No |
|                                |          |          |          |     |    |                         |                    |                    |                    |    |    |
| Hawaii <sup>d</sup>            | Democrat | NA       | Democrat | No  | No | State Health Department | Pending rulemaking | Pending rulemaking | Pending rulemaking | No | No |
|                                | Democrat | Democrat | Democrat | Yes | No | City Health Department  | Inspections        | \$200              | Yes                | No | NA |
| New York City, NY <sup>e</sup> |          |          |          |     |    |                         |                    |                    |                    |    |    |

|                                |          |          |            |     |     |                                                     |             |             |     |     |     |
|--------------------------------|----------|----------|------------|-----|-----|-----------------------------------------------------|-------------|-------------|-----|-----|-----|
| Wilmington,<br>DE <sup>f</sup> | Democrat | Democrat | Democrat   | Yes | Yes | City<br>Department of<br>Licenses and<br>Inspection | Inspections | \$200       | No  | No  | No  |
| California <sup>g</sup>        | Democrat | NA       | Democrat   | Yes | No  | State Health<br>Department                          | Inspections | \$250-\$500 | Yes | Yes | Yes |
| Louisville,<br>KY <sup>h</sup> | Democrat | Democrat | Republican | No  | No  | City Health<br>Department                           | Inspections | \$25-\$100  | No  | No  | No  |

|                                |          |          |            |     |    |                           |                        |                   |     |    |     |
|--------------------------------|----------|----------|------------|-----|----|---------------------------|------------------------|-------------------|-----|----|-----|
| Baltimore,<br>MD <sup>i</sup>  | Democrat | Democrat | Republican | No  | No | City Health<br>Department | Inspections            | \$100             | No  | No | NA  |
| Daly City,<br>CA <sup>j</sup>  | Democrat | Democrat | Democrat   | Yes | No | City Attorney             | Self-<br>certification | \$250-<br>\$1,000 | Yes | No | No  |
| Long Beach,<br>CA <sup>k</sup> | Democrat | Democrat | Democrat   | Yes | No | City Health<br>Department | Inspections            | \$100-\$500       | Yes | No | Yes |

|                                     |                     |                     |          |     |    |                          |                    |               |          |    |     |
|-------------------------------------|---------------------|---------------------|----------|-----|----|--------------------------|--------------------|---------------|----------|----|-----|
| Cathedral City, CA <sup>l</sup>     | Unable to determine | Unable to determine | Democrat | No  | No | City Manager             | Self-certification | \$100-\$500   | Yes      | No | No  |
| Lafayette, CO <sup>m</sup>          | Democrat            | Democrat            | Democrat | No  | No | County Health Department | Self-certification | No            | No fines | No | No  |
| Santa Clara County, CA <sup>n</sup> | Democrat            | Unable to determine | Democrat | Yes | No | County Health Department | Inspections        | \$250-\$1,000 | No       | No | Yes |
| Berkeley, CA <sup>o</sup>           | Unable to determine | Democrat            | Democrat | Yes | No | City Health Department   | Self-reporting     | \$100-\$500   | Yes      | No | Yes |

|                                |                     |             |            |     |     |                                         |                    |             |     |     |     |
|--------------------------------|---------------------|-------------|------------|-----|-----|-----------------------------------------|--------------------|-------------|-----|-----|-----|
| Perris, CA <sup>p</sup>        | Unable to determine | Nonpartisan | Democrat   | Yes | No  | Live Well Team of Perris                | Self-certification | \$100-\$500 | No  | Yes | Yes |
| Stockton, CA <sup>q</sup>      | Democrat            | Republican  | Democrat   | No  | No  | City Administrative Services Department | Self-certification | \$200-\$500 | Yes | No  | Yes |
| Davis, CA <sup>r</sup>         | Unable to determine | Nonpartisan | Democrat   | Yes | Yes | City Manager                            | Self-certification | \$100-\$500 | Yes | No  | No  |
| San Francisco, CA <sup>s</sup> | Democrat            | Democrat    | Republican | No  | No  | City Health Department                  | Inspections        | \$100-\$500 | No  | No  | Yes |

|                                     |          |          |            |     |    |                          |             |               |    |    |     |
|-------------------------------------|----------|----------|------------|-----|----|--------------------------|-------------|---------------|----|----|-----|
|                                     | Democrat | Democrat | Republican | Yes | No | County Health Department | Inspections | \$250-\$1,000 | No | No | Yes |
| Santa Clara County, CA <sup>t</sup> |          |          |            |     |    |                          |             |               |    |    |     |

<sup>a</sup> An Emergency Ordinance to Supplement the Codified Ordinances of Cleveland, Ohio, 1976, by Enacting New Section 241.43 Relating to Sale of Beverages Offered with Children's Meals by Food Service Operations. July 29, 2020. Available at <https://bit.ly/3yxhWq5>. Accessed August 1, 2020.

<sup>b</sup> Amending Title 6 of the Philadelphia Code, Entitled "Health Code," by Adding A New Chapter 6-311, Entitled "Children's Meals at Food Service Establishments". October 2, 2019. Available at <https://bit.ly/2WGqZlk>. Accessed August 1, 2020.

<sup>c</sup> An Act to Amend Title 16 of the Delaware Code Regarding Default Beverages in Children's Meals in Restaurants. July 17, 2019. Available at <https://legis.delaware.gov/BillDetail/47551>. Accessed August 1, 2020.

<sup>d</sup> A Bill for an Act Relating to Healthy Beverages for Children. June 28, 2019. Available at <https://bit.ly/3jx837z>. Accessed August 1, 2020.

<sup>e</sup> A Local Law to Amend the Administrative Code of the City of New York, in Relation to Selections for Beverages Included in Children's Meals. April 28, 2019. Available at <https://on.nyc.gov/3zMvOyh>. Accessed August 1, 2020.

<sup>f</sup> An Ordinance to Amend Chapter 5 of the City Code Regarding Beverages Offered in Children's Meals. October 8, 2018. Available at <https://bit.ly/3BsmIXJ>. Accessed August 1, 2020.

<sup>g</sup> An Act to Add Chapter 12.8 (Commencing with Section 114379) to Part 7 of Division 104 of the Health and Safety Code, Relating to Children's Health. September 20, 2018. Available at <https://bit.ly/3jvOSLa>. Accessed August 1, 2020.

<sup>h</sup> An Ordinance Amending Chapter 118 of the Louisville Metro Code of Ordinances Regarding Establishing the Nutrition Requirements and Default Beverages Offered with Children's Meals (as Amended). June 7, 2018. Available at <https://bit.ly/2WHZQ7J>. Accessed August 1, 2020.

<sup>i</sup> An Ordinance Concerning Food Service Facilities - Healthy Beverages for Children's Meals. April 19, 2018. Available at <https://bit.ly/3DsgN6K>. Accessed August 1, 2020.

<sup>j</sup> An Ordinance of the City Council of the City of Daly City Adding Chapter 8.72 to Title 8 of the Daly City Municipal Code Re: Establishing Healthy Default Beverages Offered with Children's Meals. January 8, 2018. Available at <https://bit.ly/3BtihMb>. Accessed August 1, 2020.

<sup>k</sup> An Ordinance of the City Council of the City of Long Beach Amending the Long Beach Municipal Code by Adding Chapter 8.17 Relating to Default Beverages Offered with Children's Meals. November 16, 2017. Available at <https://bit.ly/38rpUXh>. Accessed August 1, 2020.

<sup>l</sup> An Ordinance of the City Council of the City of Cathedral City California Adding Cathedral City Municipal Code Chapter 5.92 Requiring Healthy Beverages to be the Default Beverage Offering by Restaurants for Children's Meals. November 8, 2017. Available at <https://bit.ly/3jvPHne>. Accessed August 1, 2020.

<sup>m</sup> An Ordinance of the City Council of the City of Lafayette, Colorado, Enacting a New Article IX of Chapter 55 Establishing the Default Beverages Offered with Children's Meals within the City of Lafayette, Colorado. October 17, 2017. Available at <https://bit.ly/3BsR8sP>. Accessed August 1, 2020.

<sup>n</sup> An Ordinance of the Board of Supervisors of the County of Santa Clara Renaming Chapter XXII and Amending and Adding Sections to Chapter XXII of Division A18 of the Santa Clara County Ordinance Code Relating to Beverages in Restaurant Meals for Children. May 9, 2017. Available at <https://bit.ly/3kGb9p3>. Accessed August 1, 2020.

<sup>o</sup> Healthy Default Beverages Offered with Children’s Meals; Adding Berkeley Municipal Code Chapter 12.72. June 27, 2017. Available at <https://bit.ly/3DxCpyL>. Accessed August 1, 2020.

<sup>p</sup> An Ordinance of the City Council of the City of Perris, County of Riverside, State of California, Adding Chapter 7.46 to Title 7 of the Perris Municipal Code Establishing Default Beverages Offered in Children’s Meals. March 14, 2017. Available at <https://bit.ly/3zALi8a>. Accessed August 1, 2020.

<sup>q</sup> An Ordinance Amending Stockton Municipal Code Title 5 by Adding Chapter 5.70 Regarding Establishing the Default Beverages Offered with Children’s Meals. June 7, 2016. Available at <https://bit.ly/3kYzg2D>. Accessed August 1, 2020.

<sup>r</sup> Ordinance of the City Council of the City of Davis Adding Article 17.02 To Chapter 17 of the Davis Municipal Code Establishing Default Beverages Offered with Children's Meals. June 2, 2015. Available at <https://bit.ly/3kKsEo3>. Accessed August 1, 2020.

<sup>s</sup> Ordinance Amending Article 8 of the San Francisco Health Code by Adding Sections 471.1 through 471.9, to Set Nutritional Standards for Restaurant Food Sold Accompanied by Toys or Other Youth Focused Incentive Items. November 23, 2010. Available at <https://bit.ly/3BvInhH>. Accessed August 1, 2020.

<sup>t</sup> An Ordinance of the Board of Supervisors of the County of Santa Clara Adding Chapter XXII of Division A18 to the County of Santa Clara Ordinance Code Relating to Toys and Other Incentives with Restaurant Food. May 11, 2010. Available at <https://bit.ly/3BA5IEx>. Accessed August 1, 2020.



**Supplementary Table 5.** *Definitions included in healthy kids' meal laws enacted in the United States through August 2020 (N=20)*

| Locality               | Kids' meal <sup>a</sup> | Kids <sup>b</sup> | Default beverage <sup>c</sup> | Restaurant <sup>d</sup> | 100% Fruit Juice, Vegetable Juice <sup>e</sup> | Menu, Menu Board <sup>f</sup> | Food <sup>g</sup> | Milk substitute <sup>h</sup> | Lean protein <sup>i</sup> | Incentive item <sup>j</sup> | Meal <sup>k</sup> | Single food item <sup>l</sup> |
|------------------------|-------------------------|-------------------|-------------------------------|-------------------------|------------------------------------------------|-------------------------------|-------------------|------------------------------|---------------------------|-----------------------------|-------------------|-------------------------------|
| Cleveland, OH          | ♦                       |                   |                               | ♦                       |                                                |                               |                   |                              |                           |                             |                   |                               |
| Philadelphia, PA       | ♦                       |                   | ♦                             |                         |                                                |                               |                   |                              |                           |                             |                   |                               |
| Delaware               | ♦                       |                   | ♦                             | ♦                       |                                                |                               |                   |                              |                           |                             |                   |                               |
| Hawaii                 | ♦                       |                   | ♦                             | ♦                       | ♦                                              |                               |                   |                              |                           |                             |                   |                               |
| New York City, NY      | ♦                       | ♦                 |                               | ♦                       |                                                | ♦                             | ♦                 |                              |                           |                             |                   |                               |
| Wilmington, DE         | ♦                       |                   | ♦                             | ♦                       |                                                |                               |                   |                              |                           |                             |                   |                               |
| California             | ♦                       |                   | ♦                             | ♦                       |                                                |                               |                   | ♦                            |                           |                             |                   |                               |
| Louisville, KY         | ♦                       |                   | ♦                             |                         |                                                |                               |                   |                              | ♦                         |                             |                   |                               |
| Baltimore, MD          | ♦                       |                   |                               |                         |                                                |                               |                   |                              |                           |                             |                   |                               |
| Daly City, CA          | ♦                       |                   | ♦                             | ♦                       |                                                |                               |                   | ♦                            |                           |                             |                   |                               |
| Long Beach, CA         | ♦                       |                   | ♦                             | ♦                       |                                                |                               |                   |                              |                           |                             |                   |                               |
| Cathedral City, CA     | ♦                       |                   | ♦                             | ♦                       |                                                |                               |                   |                              |                           |                             |                   |                               |
| Lafayette, CO          | ♦                       |                   | ♦                             | ♦                       |                                                |                               |                   |                              |                           |                             |                   |                               |
| Santa Clara County, CA | ♦                       |                   |                               | ♦                       |                                                |                               |                   |                              |                           | ♦                           | ♦                 | ♦                             |
| Berkeley, CA           | ♦                       |                   | ♦                             | ♦                       |                                                |                               |                   | ♦                            |                           |                             |                   |                               |
| Perris, CA             | ♦                       |                   | ♦                             | ♦                       |                                                |                               |                   |                              |                           |                             |                   |                               |

|                        |           |          |           |           |          |          |          |          |          |          |          |          |
|------------------------|-----------|----------|-----------|-----------|----------|----------|----------|----------|----------|----------|----------|----------|
| Stockton, CA           | ◆         |          | ◆         | ◆         |          |          |          |          |          |          |          |          |
| Davis, CA              | ◆         |          | ◆         | ◆         |          |          |          |          |          |          |          |          |
| San Francisco, CA      |           |          |           | ◆         |          |          |          |          |          | ◆        | ◆        |          |
| Santa Clara County, CA |           |          |           | ◆         |          |          |          |          |          | ◆        | ◆        | ◆        |
| <b>Totals</b>          | <b>18</b> | <b>1</b> | <b>14</b> | <b>17</b> | <b>1</b> | <b>1</b> | <b>1</b> | <b>3</b> | <b>1</b> | <b>3</b> | <b>3</b> | <b>2</b> |

<sup>a</sup> One example of a definition for kids’ meal is “a combination of food and a beverage, sold together at a single price by a restaurant, primarily intended for consumption by children.”

<sup>b</sup> One example of a definition for kids is “1. Alongside any of the following words: “child,” “children,” “kids,” “junior,” “little,” “kiddie,” “kiddo,” “tyke,” any synonym or abbreviation of such words, or any word the department determines would similarly identify a children’s meal; 2. Alongside a cartoon illustration, puzzle or game; 3. Accompanied or being offered with a toy or kid’s game; or 4. With a limitation on the maximum age of a person who can select the item or items.”

<sup>c</sup> One example of a definition for default beverage is “a beverage automatically included or offered as part of a children’s meal, absent a specific request for a substitute or alternate beverage by the purchaser of the children’s meal.”

<sup>d</sup> One example of a definition for restaurant is “a food establishment that serves food to customers for consumption on or off the premises, including fast-food and full-service dining establishments. “Restaurant” includes but is not limited to drive-through or walk-up counters, coffee shops, cafes, pizza parlors, food stands, movie theater concession stands, and dine-in establishments. For purposes of this definition, a restaurant may provide alcoholic beverage sales for drinking on premises; provided that such sales are ancillary to food service.”

<sup>e</sup> One example of a definition for 100% fruit juice or vegetable juice is “any liquid consisting of one hundred percent fruit juice or vegetable juice with no added sugar, corn syrup, or caloric sweetener.”

<sup>f</sup> One example of a definition for menu or menu board is “a printed list of the names or images of a food item or items, and the primary writing of a covered establishment from which a customer makes an order selection. Menus include breakfast, lunch, and dinner menus; dessert menus; beverage menus; children’s menus; other specialty menus; electronic menus; and menus on the internet, and may be in various forms, including booklets, pamphlets, single sheets of paper, or electronic screens. Determining whether a writing is or is part of the primary writing of a covered establishment depends on a number of factors, including whether the writing lists the name of a standard menu item (or an image depicting the standard menu item) and the price of the standard menu item, and whether the writing can be used by a customer to make an order selection at the time the customer is viewing the writing. Menu boards include menu boards inside the establishment as well as drive-through menu boards outside the establishment.”

<sup>g</sup> One example of a definition for food is “any raw, cooked or processed edible substances, beverages, ingredients, chewing gum, ice, or water used or intended for use or for sale in whole or in part for human consumption.”

<sup>h</sup> One example of a definition for milk substitute is “a non-dairy plant-based drink served in place of milk, including but not limited to soy milk, almond milk, or rice milk.”

<sup>i</sup> One example of a definition for lean protein is “a food containing less than 10 grams of fat, 4.5 grams or less of saturated fat and less than 95 milligrams of cholesterol per 100 grams and per labeled serving.”

<sup>j</sup> One example of a definition for incentive item is “(1) any toy, game, trading card, admission ticket or other consumer product, whether physical or digital, with particular appeal to children and teens but not including "Single Use Articles" as defined in California Health & Safety Code Section 113914 as of January 1, 2009, or (2) any coupon, voucher, ticket, token, code, or password redeemable for or granting digital or other access to an item listed in (d)(1). If the incentive item consists of a food product, the food product shall be considered as part of the Meal under Section 417.4. for purposes of determining whether the Meal meets the nutritional standards.”

<sup>k</sup> One example of a definition for meal is “any combination of Food Items offered together for a single price. “Meal” means any combination of Single Food Items and/or beverages offered together for a single price.”

<sup>l</sup> One example of a definition for single food item is “the complete contents of any food offered for individual sale by a Restaurant, not including beverages.”

**Supplementary Figure 1.** *Domains and operational definitions of policy elements in Healthy Kids' Meal Policy Assessment Tool.*

| <b>Domain</b>                  | <b>Component</b>          | <b>Operational definition</b>                                                                                                                                                                | <b>Example</b>                                                                                                                             |
|--------------------------------|---------------------------|----------------------------------------------------------------------------------------------------------------------------------------------------------------------------------------------|--------------------------------------------------------------------------------------------------------------------------------------------|
| <b>General characteristics</b> | Locality                  | Location where policy will take effect                                                                                                                                                       | New York City, NY <sup>a</sup>                                                                                                             |
|                                | Title of legislation      | Title of legislation                                                                                                                                                                         | A Local Law to amend the administrative code of the city of New York, in relation to selections for beverages included in children's meals |
|                                | Jurisdiction              | What level of jurisdiction was the bill introduced at (city or county or state)?                                                                                                             | City                                                                                                                                       |
|                                | Type of policy            | Is the policy a piece of legislation or an executive order (legislation, executive order, regulation)?                                                                                       | Legislation                                                                                                                                |
|                                | Decision-making authority | Which body is responsible for the rule-making of the policy?                                                                                                                                 | City Health Department                                                                                                                     |
|                                | Focus of policy           | What is the focus of this policy (nutritional standards, default beverage, toy restriction)?                                                                                                 | Default beverage                                                                                                                           |
|                                | State law                 | Has a healthy kids' meal (HKM) policy been passed at the state level?<br><br>If yes, please include the type of state HKM policy (nutritional standards, default beverage, toy restriction). | No                                                                                                                                         |
|                                | Preemption <sup>b</sup>   | Is there preemptive language in the policy?<br><br>*This only applies to state laws. Please mark NA <sup>c</sup> for non-state laws. Please see below for examples of preemptive language.   | NA                                                                                                                                         |
|                                | Vote                      | Breakdown of voting results (number in favor-number opposed-number absent-number abstained)                                                                                                  | 43-4-3-0                                                                                                                                   |
|                                | Date enacted              | What date was the policy passed and adopted (signed into approval by executive)?                                                                                                             | 04/28/2019                                                                                                                                 |
|                                | Date effective            | What date does the policy go into effect?                                                                                                                                                    | 04/28/2020                                                                                                                                 |

|  |                                       |                                                                                                                                                                                 |                                                                                                                                                                                                                                |
|--|---------------------------------------|---------------------------------------------------------------------------------------------------------------------------------------------------------------------------------|--------------------------------------------------------------------------------------------------------------------------------------------------------------------------------------------------------------------------------|
|  |                                       | This is usually included in the form of “ordinance is operable X days after its passage.” Please note that sometimes this date will be based off the executive’s approval date. |                                                                                                                                                                                                                                |
|  | Bill sponsor                          | What is the name and title of person(s) who introduced the policy                                                                                                               | Council Member Ben Kallos                                                                                                                                                                                                      |
|  | Party of sponsor                      | What is the political party of legislator responsible for policy?                                                                                                               | Democrat                                                                                                                                                                                                                       |
|  | Dominant party of the local executive | What is the party of the mayor or county executive?                                                                                                                             | Democrat                                                                                                                                                                                                                       |
|  | Dominant party of the state           | What is the party of the governor?                                                                                                                                              | Democrat                                                                                                                                                                                                                       |
|  | Fiscal note                           | Does the policy have a fiscal note attached?                                                                                                                                    | Yes                                                                                                                                                                                                                            |
|  | Impact on revenues                    | What is the anticipated impact of this policy on revenues?                                                                                                                      | It is anticipated that the proposed legislation would have no impact on revenues despite the allowance for civil penalties because full compliance with the law is anticipated.                                                |
|  | Impact on expenditures                | What is the anticipated impact of this policy on expenditures?                                                                                                                  | It is anticipated that there would be no impact on expenditures resulting from the enactment of this legislation because DOHMH <sup>d</sup> would utilize existing resources to implement the requirements of the legislation. |
|  | Committee report                      | Does the codified bill have a committee report attached?                                                                                                                        | Yes                                                                                                                                                                                                                            |
|  | Committee assigned                    | What committee was the codified bill referred to?                                                                                                                               | Committee on Health                                                                                                                                                                                                            |
|  | Policy note                           | Does the policy have a policy note attached?                                                                                                                                    | No                                                                                                                                                                                                                             |
|  | Purpose                               | Is the purpose of the policy explicitly described in the codified bill?                                                                                                         | NA                                                                                                                                                                                                                             |

|                                       |                                    |                                                                                                                                                                                |                                                                                                                                                                              |
|---------------------------------------|------------------------------------|--------------------------------------------------------------------------------------------------------------------------------------------------------------------------------|------------------------------------------------------------------------------------------------------------------------------------------------------------------------------|
|                                       |                                    | <p>If yes, what is the purpose of the policy?</p> <p>If the policy doesn't have a background/preamble or committee report AND a purpose is not stated, please mark NA.</p>     |                                                                                                                                                                              |
|                                       | Disparities <sup>e</sup>           | Is there specific mention of disparities or differences in race, SES <sup>f</sup> , or geography in the policy?                                                                | NA                                                                                                                                                                           |
|                                       | Inequities <sup>g</sup>            | Is there specific mention of inequity or injustice in the policy?                                                                                                              | NA                                                                                                                                                                           |
|                                       | Economic implications <sup>h</sup> | Is there specific mention of the economic costs of sugary beverage consumption, poor diet or obesity in the policy?                                                            | NA                                                                                                                                                                           |
| <b>Implementation characteristics</b> | Communication                      | Is there specification about how to communicate the new policy once it is passed and/or is enforced?                                                                           | Yes<br>The commissioner of health and mental hygiene may take all actions necessary for its implementation, including the promulgation of rules, before such effective date. |
|                                       | Technical assistance               | Is there specification about whether the administrative agency must provide technical assistance?                                                                              | No                                                                                                                                                                           |
|                                       | Default beverage offering          | <p>What language is used around <i>offering/publishing/listing</i> default beverages?</p> <p>Please mark NA for toy requirement policies.</p>                                  | The selection of beverages listed as part of the children's meal shall be limited to the following:                                                                          |
|                                       | Incentive offering                 | <p>What language is used around giving away of <i>free</i> toys or other incentives?</p> <p>Please mark NA for nutritional standards or healthy default beverage policies.</p> | NA                                                                                                                                                                           |

|                                    |                                                                                                                                        |                                                                                                                                         |                                                                                                                                                                                                                                               |
|------------------------------------|----------------------------------------------------------------------------------------------------------------------------------------|-----------------------------------------------------------------------------------------------------------------------------------------|-----------------------------------------------------------------------------------------------------------------------------------------------------------------------------------------------------------------------------------------------|
| <b>Enforcement characteristics</b> | Monitoring/Compliance agency                                                                                                           | Which agency is responsible for monitoring the roll out of the policy and restaurant compliance?                                        | City Health Department                                                                                                                                                                                                                        |
|                                    | Enforcement mechanism                                                                                                                  | How is the policy enforced?                                                                                                             | Inspections                                                                                                                                                                                                                                   |
|                                    | Violation fines                                                                                                                        | Will restaurants be fined for violating the policy?                                                                                     | Yes                                                                                                                                                                                                                                           |
|                                    | Fine amount                                                                                                                            | What is the maximum penalty for violating the policy?                                                                                   | \$200                                                                                                                                                                                                                                         |
| <b>Definitions</b>                 | Definitions included and used: child, kids' meals, food, sugary drinks, restaurants/food service establishments, menu, incentive, etc. | What definitions were specified for use in the policy?                                                                                  | Children's meal, food, food service establishment, menu/menu board                                                                                                                                                                            |
|                                    | Children's meal definition                                                                                                             | How is "children's meal" defined?<br><br>Please enter NA for those policies without this definition.                                    | Children's meal.<br><br>The term "children's meal" means a food or combination of food items listed on a menu or menu board and intended for consumption by children to which the presumption described in subdivision e attaches.            |
|                                    | Any additional specification of what constitutes a children's meal                                                                     | The policy has specific text referencing how a children's meal may be perceived such as food items appearing alongside the word "kids". | It shall be a rebuttable presumption that a food item or combination of food items on a menu or menu board is intended for consumption by children if the item or items are shown on the menu or menu board in any one of the following ways: |

|  |                                                                               |                                                                                                        |                                                                                                                                                                                                                                                                                                                                                                                                                                                                                                                                        |
|--|-------------------------------------------------------------------------------|--------------------------------------------------------------------------------------------------------|----------------------------------------------------------------------------------------------------------------------------------------------------------------------------------------------------------------------------------------------------------------------------------------------------------------------------------------------------------------------------------------------------------------------------------------------------------------------------------------------------------------------------------------|
|  |                                                                               |                                                                                                        | <ol style="list-style-type: none"> <li>1. Alongside any of the following words: “child,” “children,” “kids,” “junior,” “little,” “kiddie,” “kiddo,” “tyke,” any synonym or abbreviation of such words, or any word the department determines would similarly identify a children’s meal;</li> <li>2. Alongside a cartoon illustration, puzzle or game;</li> <li>3. Accompanied or being offered with a toy or kid’s game; or</li> <li>4. With a limitation on the maximum age of a person who can select the item or items.</li> </ol> |
|  | <p>Restaurant definition (also referred to as food service establishment)</p> | <p>How is “restaurant” defined?</p> <p>Please enter NA for those policies without this definition.</p> | <p>Food service establishment.</p> <p>The term “food service establishment” means any establishment inspected pursuant to the restaurant grading program established pursuant to subdivision a of section 81.51 of the New York city health code.</p> <p>(s) Food service establishment means a place where food is</p>                                                                                                                                                                                                                |



|  |                 |                                                                                                                                                                                                                                                                         |                                                                                                                                                                                                                                                                                                                                                                |
|--|-----------------|-------------------------------------------------------------------------------------------------------------------------------------------------------------------------------------------------------------------------------------------------------------------------|----------------------------------------------------------------------------------------------------------------------------------------------------------------------------------------------------------------------------------------------------------------------------------------------------------------------------------------------------------------|
|  |                 |                                                                                                                                                                                                                                                                         | provided for individual portion service directly to the consumer whether such food is provided free of charge or sold, and whether consumption occurs on or off the premises or is provided from a pushcart, stand or vehicle.                                                                                                                                 |
|  | Food definition | <p>How is “food” defined?</p> <p>Please note if the definition was acquired from an existing health code and not stated directly in the policy. Please acquire definition from appropriate code.</p> <p>Please enter NA for those policies without this definition.</p> | <p>Food. The term “food” has the same meaning as in article 71 of the New York city health code.</p> <p>Food means any raw, cooked or processed edible substances, beverages, ingredients, chewing gum, ice, or water used or intended for use or for sale in whole or in part for human consumption.</p>                                                      |
|  | Menu definition | <p>How is “menu” defined?</p> <p>Please enter NA for those policies without this definition.</p>                                                                                                                                                                        | <p>Menu or menu board.</p> <p>The term “menu or menu board” has the same meaning as in section 81.49 of the New York city health code.</p> <p>(5) Menu or menu board means a printed list of the names or images of a food item or items, and the primary writing of a covered establishment from which a customer makes an order selection. Menus include</p> |

|  |                            |                                   |                                                                                                                                                                                                                                                                                                                                                                                                                                                                                                                                                                                                                                                                                                                                                                                                                              |
|--|----------------------------|-----------------------------------|------------------------------------------------------------------------------------------------------------------------------------------------------------------------------------------------------------------------------------------------------------------------------------------------------------------------------------------------------------------------------------------------------------------------------------------------------------------------------------------------------------------------------------------------------------------------------------------------------------------------------------------------------------------------------------------------------------------------------------------------------------------------------------------------------------------------------|
|  |                            |                                   | <p>breakfast, lunch, and dinner menus; dessert menus; beverage menus; children’s menus; other specialty menus; electronic menus; and menus on the internet, and may be in various forms, including booklets, pamphlets, single sheets of paper, or electronic screens. Determining whether a writing is or is part of the primary writing of a covered establishment depends on a number of factors, including whether the writing lists the name of a standard menu item (or an image depicting the standard menu item) and the price of the standard menu item, and whether the writing can be used by a customer to make an order selection at the time the customer is viewing the writing. Menu boards include menu boards inside the establishment as well as drive-through menu boards outside the establishment.</p> |
|  | Children’s menu definition | How is “children’s menu” defined? | NA                                                                                                                                                                                                                                                                                                                                                                                                                                                                                                                                                                                                                                                                                                                                                                                                                           |

|                            |                                          |                                                                                                                                                                   |     |
|----------------------------|------------------------------------------|-------------------------------------------------------------------------------------------------------------------------------------------------------------------|-----|
|                            |                                          | Please enter NA for those policies without this definition.                                                                                                       |     |
|                            | Online menu definition                   | How is “online menu” defined?<br><br>Please enter NA for those policies without this definition.                                                                  | NA  |
|                            | Incentive item definition                | How is “incentive item” defined?<br><br>Please enter NA for those policies without this definition.                                                               | NA  |
|                            | Default beverage definition              | How is “default beverage” defined?<br><br>Please enter NA for those policies without this definition.                                                             | NA  |
|                            | Non-dairy beverage definition            | How is “non-dairy beverage” defined?<br><br>Please enter NA for those policies without this definition.                                                           | NA  |
|                            | <i>Add in any additional definitions</i> | Free text                                                                                                                                                         | NA  |
|                            | Restaurant type                          | Does this policy apply only to certain types of food service establishments?<br><br>This can include information such as the size of chain and number of outlets. | No  |
| <b>Nutrition standards</b> | Water                                    | Is water allowed?                                                                                                                                                 | Yes |
|                            |                                          | Is flavored water allowed?                                                                                                                                        | Yes |
|                            |                                          | Is sparkling water allowed?                                                                                                                                       | Yes |
|                            |                                          | Are caloric sweeteners in water allowed?                                                                                                                          | No  |
|                            |                                          | Are non-caloric sweeteners in water allowed?                                                                                                                      | No  |
|                            |                                          | Are artificial flavors or colors in water allowed?                                                                                                                | No  |

|  |                     |                                                                                                                              |                   |
|--|---------------------|------------------------------------------------------------------------------------------------------------------------------|-------------------|
|  |                     | Is there a beverage size specification for water?<br>If yes, what size?                                                      | No                |
|  |                     | Is there a caloric limit specified for water?<br>If yes, what is it?                                                         | No                |
|  | Milk                | Is milk allowed?                                                                                                             | Yes               |
|  |                     | Is nonfat (fat-free) milk allowed?                                                                                           | Yes               |
|  |                     | Is low-fat (1%) milk allowed?                                                                                                | Yes               |
|  |                     | Is whole/2% milk allowed?                                                                                                    | No                |
|  |                     | Is flavored (sweetened) milk allowed?                                                                                        | Yes               |
|  |                     | Are caloric sweeteners in milk allowed?                                                                                      | No                |
|  |                     | Are non-caloric sweeteners in milk allowed?                                                                                  | No                |
|  |                     | Are artificial flavors or colors in milk allowed?                                                                            | No                |
|  |                     | Is there a beverage size specification for milk?                                                                             | Yes, 8 oz or less |
|  |                     | Is there a caloric limit specified for milk?                                                                                 | No                |
|  | Non-dairy beverages | Are non-dairy beverages (milk substitutes) allowed?                                                                          | Yes               |
|  |                     | Are flavored non-dairy beverages (milk substitutes) allowed?                                                                 | Yes               |
|  |                     | Are caloric sweeteners in non-dairy beverages (milk substitutes) allowed?                                                    | No                |
|  |                     | Are non-caloric sweeteners in non-dairy beverages (milk substitutes) allowed?                                                | No                |
|  |                     | Are artificial flavors or colors in non-dairy beverages (milk substitutes) allowed?                                          | No                |
|  |                     | Does the non-dairy beverage (milk substitutes) need to be nutritionally equivalent to fluid milk (e.g., fortified soy milk)? | Yes               |
|  |                     | Is there a beverage size specification for non-dairy beverage (milk substitutes)?                                            | Yes, 8 oz or less |
|  |                     | Is there a caloric limit specified for non-dairy beverage (milk substitutes)?                                                | No                |

|  |                           |                                                                                                                                                                                         |           |
|--|---------------------------|-----------------------------------------------------------------------------------------------------------------------------------------------------------------------------------------|-----------|
|  | Juice                     | Is 100% fruit juice allowed?                                                                                                                                                            | Yes       |
|  |                           | Is 100% vegetable juice allowed?                                                                                                                                                        | Yes       |
|  |                           | Is a combination of fruit and vegetable juice allowed?                                                                                                                                  | Yes       |
|  |                           | Is juice combined with water (carbonated or not) allowed?                                                                                                                               | Yes       |
|  |                           | Are caloric sweeteners in juice allowed?                                                                                                                                                | No        |
|  |                           | Are non-caloric sweeteners in juice allowed?                                                                                                                                            | No        |
|  |                           | Are artificial flavors or colors in juice allowed?                                                                                                                                      | No        |
|  |                           | Is there a beverage size specification for the juice?                                                                                                                                   | Yes, 8 oz |
|  |                           | Is there a caloric limit specified for juice?                                                                                                                                           | No        |
|  | Other beverages           | Are any additional beverage types allowed?                                                                                                                                              | No        |
|  | Nutritional requirements  | Description of nutritional requirements for children’s meals. This is specific only to food items included in the children’s meal.<br><br>Please mark NA for default beverage policies. | NA        |
|  | Additional meal standards | Is there specification for nutritional standards for items other than children’s meals?                                                                                                 | No        |

---

<sup>a</sup> NY is the acronym for New York state.

<sup>b</sup> Preemption occurs when the state or federal government body passes a law or issues agency rules that eliminate or restrict the authority of local governments to regulate a certain issue. When local laws are preempted, they usually have no force or effect.

<sup>c</sup> NA is the acronym for not applicable.

<sup>d</sup> DOHMH is the acronym for the New York City Department of Health and Mental Hygiene.

<sup>e</sup> Defined as “differences that occur by gender, race or ethnicity, education or income, disability, geographic location, or sexual orientation” such as differences in the incidence, prevalence, mortality, and burden of diseases.

<sup>f</sup> SES is the acronym for socioeconomic status.

<sup>g</sup> Defined as “systematic conditions and factors operating on a systems-/individual-level limiting equal access and opportunities.” Examples can include a lack of geographic access to resources, lack of resource availability, vulnerability to certain exposures, powerlessness, etc.

<sup>h</sup> Defined here as the direct and indirect economic costs of diet-related illness such as costs to the health care system.

**Supplementary Figure 2.** Operationalization of nutrition standards for beverages and meal components using the 2019 HER<sup>a</sup> Beverage Consumption Guidelines in Early Childhood, NRA<sup>b</sup> Kids Live Well 2019 Beverage Recommendations.

| <u>2019 HER Beverage Consumption Guidelines in Early Childhood<sup>27</sup></u>                                                                                                                                                                                                                                                                                                                                                                                                                                                                                                                                                                                                                                                                                                                                                                                                                                                                                                                                                                                                                                                                                                                                                                                                                                                                  | <u>NRA Kids Live Well 2019 Beverage Recommendations<sup>28</sup></u>                                                                                                                                                                                                                                                                                                                                                                                                                                                                                                                                                                                                                                                                                                                                                                                                                                                                                                                                                                                                                                                                                                                                                                                                                                                                                                                                                                                               |
|--------------------------------------------------------------------------------------------------------------------------------------------------------------------------------------------------------------------------------------------------------------------------------------------------------------------------------------------------------------------------------------------------------------------------------------------------------------------------------------------------------------------------------------------------------------------------------------------------------------------------------------------------------------------------------------------------------------------------------------------------------------------------------------------------------------------------------------------------------------------------------------------------------------------------------------------------------------------------------------------------------------------------------------------------------------------------------------------------------------------------------------------------------------------------------------------------------------------------------------------------------------------------------------------------------------------------------------------------|--------------------------------------------------------------------------------------------------------------------------------------------------------------------------------------------------------------------------------------------------------------------------------------------------------------------------------------------------------------------------------------------------------------------------------------------------------------------------------------------------------------------------------------------------------------------------------------------------------------------------------------------------------------------------------------------------------------------------------------------------------------------------------------------------------------------------------------------------------------------------------------------------------------------------------------------------------------------------------------------------------------------------------------------------------------------------------------------------------------------------------------------------------------------------------------------------------------------------------------------------------------------------------------------------------------------------------------------------------------------------------------------------------------------------------------------------------------------|
| <ul style="list-style-type: none"> <li>• Water — 4-5 years (37-60 months): 1.5 to 5 cups (12-40 ounces) per day of plain, fluoridated drinking water.</li> </ul> <p><i>&gt;If the bill offers water (plain, unflavored), it meets the water recommendation.</i></p> <ul style="list-style-type: none"> <li>• Milk — 2-5 years: At 2 years of age (24 months), children should transition to plain, pasteurized fat-free (skim) or low-fat (1%) milk. Total daily milk intake may be up to 2 cups per day (16 ounces) for children ages 2 to 3 years and up to 2.5 cups per day (20 ounces) for children ages 4 to 5 years. <ul style="list-style-type: none"> <li>○ Flavored milk is not recommended.</li> <li>○ 1-5 years (12-60 months): Plant milks/non-dairy beverages are not recommended for exclusive consumption in place of dairy milk (<b>with the exception of soy milk</b>); consume only when medically indicated or to meet specific dietary preferences.</li> </ul> </li> </ul> <p><i>&gt; If the bill offers PLAIN nonfat or low-fat (1%) milk, it meets the milk recommendation.</i></p> <p><i>&gt; If the bill offers “milk” with no specification, whole/2% milk, it does NOT meet the milk recommendation.</i></p> <p><i>&gt; If the bill offers FLAVORED AND PLAIN milk, it does NOT meet the milk recommendations.</i></p> | <ul style="list-style-type: none"> <li>• Water — Options include water, sparkling water or flavored water, with no added natural or artificial sweeteners.</li> </ul> <p><i>&gt;If the bill offers water (plain, carbonated, flavored) with no added natural or artificial sweeteners, it meets the recommendation.</i></p> <p><i>&gt; If no added natural or artificial sweeteners are specified but all other specifications are met, it meets the recommendation.</i></p> <ul style="list-style-type: none"> <li>• Milk — Options include flavored or unflavored nonfat or low-fat (1%) dairy milk or non-dairy beverage that is nutritionally equivalent to fluid milk (e.g., fortified soymilk) in a serving size of 8 ounces or less.</li> </ul> <p><i>&gt; If the bill offers plain/flavored nonfat or low-fat (1%) milk, it meets this recommendation.</i></p> <p><i>&gt; If the bill offers “milk” with no specification, whole/2% milk, it does NOT meet this recommendation.</i></p> <p><i>&gt; If the bill offers plain/flavored nondairy milk alternatives that are of equivalent nutritional value to milk, it meets this recommendation.</i></p> <p><i>&gt; However, if the size is specified in the bill and is greater than 8 ounces, it does NOT meet the recommendation.</i></p> <ul style="list-style-type: none"> <li>• Juice — Options include 100% fruit or vegetable juice, or fruit and/or vegetable juice combined with water</li> </ul> |

|                                                                                                                                                                                                                                                                                                                                                                                                                                                                                                                                                                                                                                                                                                                                                                                                                                                                                                                                                                                                                                                                                                                                                                                                                                                                                 |                                                                                                                                                                                                                                                                                                                                                                                                                                                                                                                                                                                                                                                                                                                                                    |
|---------------------------------------------------------------------------------------------------------------------------------------------------------------------------------------------------------------------------------------------------------------------------------------------------------------------------------------------------------------------------------------------------------------------------------------------------------------------------------------------------------------------------------------------------------------------------------------------------------------------------------------------------------------------------------------------------------------------------------------------------------------------------------------------------------------------------------------------------------------------------------------------------------------------------------------------------------------------------------------------------------------------------------------------------------------------------------------------------------------------------------------------------------------------------------------------------------------------------------------------------------------------------------|----------------------------------------------------------------------------------------------------------------------------------------------------------------------------------------------------------------------------------------------------------------------------------------------------------------------------------------------------------------------------------------------------------------------------------------------------------------------------------------------------------------------------------------------------------------------------------------------------------------------------------------------------------------------------------------------------------------------------------------------------|
| <p>&gt; <i>If the bill offers PLAIN nondairy milk alternatives that are of equivalent nutritional value to milk (plain soy milk), it meets the nondairy milk alternative recommendation.</i></p> <p>&gt; <i>If the milk alternative is FLAVORED, it does NOT meet the recommendation.</i></p> <ul style="list-style-type: none"> <li>• Juice — 4-5 years (37-60 months): No more than 4 to 6 ounces of 100% juice per day. These recommendations also extend to 100% fruit and vegetable juice blends.</li> </ul> <p>&gt; <i>If the bill just says “juice”, it does NOT meet the recommendation.</i></p> <p>&gt; <i>If the bill just says “100% juice”, it meets the recommendation.</i></p> <p>&gt; <i>If the bill includes 100% juice combined with water or sparkling water, it meets the recommendation.</i></p> <p>&gt; <i>However, if the size (or calories) is specified in the bill and is greater than 6 ounces (or 40 calories), it does NOT meet the recommendation.</i></p> <ul style="list-style-type: none"> <li>➤ <i>If the size limit or caloric limit are not specified in the bill, it does NOT meet the recommendation.</i></li> <li>➤ <i>A caloric limit of 40 calories or less is equivalent to what is expected from a 6 ounces juice box.</i></li> </ul> | <p>or carbonated water, with no added natural or artificial sweeteners, in a serving size of 8 ounces or less.</p> <p>&gt; <i>If the bill just says “Juice”, it does NOT meet the recommendation.</i></p> <p>&gt; <i>If the bill just says “100% Juice” with no added natural or artificial sweeteners, it meets the recommendation.</i></p> <p>&gt; <i>If the bill includes 100% juice combined with water or sparkling water, it meets the recommendation.</i></p> <p>&gt; <i>However, if the size is specified in the bill and is greater than 8 ounces, it does not meet the recommendation.</i></p> <ul style="list-style-type: none"> <li>➤ <i>If the size is not specified in the bill, it does NOT meet the recommendation.</i></li> </ul> |
|---------------------------------------------------------------------------------------------------------------------------------------------------------------------------------------------------------------------------------------------------------------------------------------------------------------------------------------------------------------------------------------------------------------------------------------------------------------------------------------------------------------------------------------------------------------------------------------------------------------------------------------------------------------------------------------------------------------------------------------------------------------------------------------------------------------------------------------------------------------------------------------------------------------------------------------------------------------------------------------------------------------------------------------------------------------------------------------------------------------------------------------------------------------------------------------------------------------------------------------------------------------------------------|----------------------------------------------------------------------------------------------------------------------------------------------------------------------------------------------------------------------------------------------------------------------------------------------------------------------------------------------------------------------------------------------------------------------------------------------------------------------------------------------------------------------------------------------------------------------------------------------------------------------------------------------------------------------------------------------------------------------------------------------------|

<sup>a</sup> HER is the acronym for the Healthy Eating Research program.

<sup>b</sup> NRA is the acronym for the National Restaurant Association.

**Supplementary Figure 3.** *Item-level and overall level of agreement of policy elements in Healthy Kids' Meal Policy Assessment Tool.*

| <b>Item</b>                                                                                                  | <b>Kappa<sup>a</sup></b>  |
|--------------------------------------------------------------------------------------------------------------|---------------------------|
| Which locality are you reviewing?                                                                            | 1                         |
| Which policy are you reviewing?                                                                              | 1                         |
| What is the title of the legislation?                                                                        | 1                         |
| What area of jurisdiction was the policy introduced at?                                                      | 1                         |
| For local policies, has a healthy kids' meal policy been passed at the state level?                          | 1                         |
| For local policies, what type of healthy kids' meal policy been passed at the state level?                   | 1                         |
| Was the policy passed as a piece of legislation or via executive order?                                      | Too few categories        |
| Which body is responsible for the rulemaking (lawmaking) of the policy?                                      | 0.0286                    |
| Which body is responsible for the rulemaking (lawmaking) of the policy? Text entry.                          | Insufficient observations |
| What is the focus of this kids' meal policy (nutritional standards, default beverage, toy)?                  | 0.8571                    |
| Is this bill a law?                                                                                          | Too few categories        |
| Is there preemptive language in the policy?                                                                  | 1                         |
| What was the breakdown of the vote to pass this policy? - Number in favor                                    | 0.8916                    |
| What was the breakdown of the vote to pass this policy? - Number opposed                                     | 1                         |
| What was the breakdown of the vote to pass this policy? - Number absent                                      | 1                         |
| What was the breakdown of the vote to pass this policy? - Number abstained                                   | 1                         |
| What date was the policy enacted? (MM/DD/YYYY)                                                               | 0.8953                    |
| What date does the policy go into effect? (MM/DD/YYYY)                                                       | 0.9475                    |
| Who sponsored the bill?                                                                                      | 0.6867                    |
| What was the political party of the bill sponsor?                                                            | 0.6098                    |
| What was the political party of the bill sponsor? Text entry.                                                | Insufficient observations |
| What is the party of the mayor or county executive?                                                          | 0.633                     |
| What is the party of the mayor or county executive? Text entry.                                              | 1                         |
| What is the political party of the governor?                                                                 | 0.8788                    |
| What is the political party of the governor? Text entry.                                                     | Insufficient observations |
| Does the policy have a fiscal note attached?                                                                 | 0.4                       |
| What is the anticipated impact of this policy on revenues?                                                   | 0.5455                    |
| What is the anticipated impact of this policy on expenditures?                                               | 0.4915                    |
| Does the policy have a policy note attached?                                                                 | 0.3182                    |
| What committee was the bill referred to?                                                                     | 0.7872                    |
| Does the bill have a committee report attached?                                                              | 0.6117                    |
| Which agency is responsible for monitoring the roll out of the policy and restaurant compliance?             | 0.7315                    |
| Which agency is responsible for monitoring the roll out of the policy and restaurant compliance? Text entry. | 0.7619                    |



|                                                                                                                          |                           |
|--------------------------------------------------------------------------------------------------------------------------|---------------------------|
| How is the policy enforced?                                                                                              | 1                         |
| How is the policy enforced? Text entry.                                                                                  | 1                         |
| Will restaurants be fined for violating the policy?                                                                      | 0.8347                    |
| What is the maximum penalty for violating the policy?                                                                    | 0.8945                    |
| Is there specification about how to communicate the new policy once it is passed and/or is enacted?                      | 0.7                       |
| Is there specification about how to communicate the new policy once it is passed and/or is enacted? Text entry.          | 1                         |
| Is there specification about whether the administrative agency/body must provide technical assistance? - Selected Choice | 0.6078                    |
| Is there specification about whether the administrative agency/body must provide technical assistance? Text entry.       | 1                         |
| Is the purpose of the policy explicitly described in the codified bill?                                                  | 0.3103                    |
| What is the purpose of the policy (explicitly described in the codified bill)?                                           | 0.7568                    |
| Is there specific mention of disparities or differences in race, SES, or geography in the policy?                        | 0.8182                    |
| Is there specific mention of disparities or differences in race, SES, or geography in the policy? Text entry.            | 0.5714                    |
| Is there specific mention of inequity or injustice in the policy?                                                        | 0.6                       |
| Is there specific mention of inequity or injustice in the policy? Text entry.                                            | 1                         |
| Is there specific mention of economic implications of sugary beverage consumption or obesity?                            | 1                         |
| Is there specific mention of economic implications of sugary beverage consumption or obesity? Text entry.                | 1                         |
| What definitions are included in the policy?                                                                             | 1                         |
| How is "children's (kids') meal" defined?                                                                                | 1                         |
| Are there any additional specifications of what constitutes a children's meal beyond the definition?                     | 1                         |
| Are there any additional specifications of what constitutes a children's meal beyond the definition? Text entry.         | 1                         |
| How is "restaurant" or "food service establishment" defined?                                                             | 1                         |
| How is "food" defined?                                                                                                   | 1                         |
| How is "menu" defined?                                                                                                   | 0.6491                    |
| How is "children's (kids') menu" defined?                                                                                | Too few categories        |
| How is "online menu" defined?                                                                                            | Too few categories        |
| How is "incentive item" defined?                                                                                         | 1                         |
| How is "default beverage" defined?                                                                                       | 1                         |
| How is "non-dairy beverage" defined?                                                                                     | 1                         |
| Include any other terms and definitions here.                                                                            | 1                         |
| Does this policy apply only to certain types of food service establishments?                                             | 0.0909                    |
| Does this policy apply only to certain types of food service establishments? Text entry.                                 | Insufficient observations |
| What language is used around offering/publishing/listing default beverages?                                              | 1                         |
| What language is used around giving away of free toys or other incentives?                                               | 1                         |

|                                                                                                                              |                           |
|------------------------------------------------------------------------------------------------------------------------------|---------------------------|
| Please list the nutritional requirements for food components of the children's meal if included.                             | 1                         |
| Is there specification for nutritional standards for meals other than children's meals?                                      | 1                         |
| Is there specification for nutritional standards for meals other than children's meals? Text entry.                          | 1                         |
| Is water allowed?                                                                                                            | 1                         |
| Is flavored water allowed?                                                                                                   | 1                         |
| Is sparkling water allowed?                                                                                                  | 1                         |
| Are caloric sweeteners in water allowed?                                                                                     | 1                         |
| Are non-caloric sweeteners in water allowed?                                                                                 | 1                         |
| Are artificial flavors or colors in water allowed?                                                                           | 1                         |
| Is there a beverage size specification for water?                                                                            | 1                         |
| Is there a beverage size specification for water? Text entry.                                                                | Insufficient observations |
| Is there a caloric limit specified for water?                                                                                | 1                         |
| Is there a caloric limit specified for water? Text entry.                                                                    | Insufficient observations |
| Is milk allowed?                                                                                                             | 1                         |
| Is nonfat (fat-free) milk allowed?                                                                                           | 1                         |
| Is low-fat (1%) milk allowed?                                                                                                | 1                         |
| Is whole/2% milk allowed?                                                                                                    | 1                         |
| Is flavored (sweetened) milk allowed?                                                                                        | 1                         |
| Are caloric sweeteners in milk allowed?                                                                                      | 1                         |
| Are non-caloric sweeteners in milk allowed?                                                                                  | 1                         |
| Are artificial flavors or colors in milk allowed?                                                                            | 0.7778                    |
| Is there a beverage size specification for milk?                                                                             | 1                         |
| Is there a beverage size specification for milk? Text entry.                                                                 | 1                         |
| Is there a caloric limit specified for milk?                                                                                 | 1                         |
| Is there a caloric limit specified for milk? Text entry.                                                                     | 1                         |
| Are non-dairy beverages (milk substitutes) allowed?                                                                          | 1                         |
| Are non-dairy beverages (milk substitutes) allowed? Text entry.                                                              | 1                         |
| Are flavored non-dairy beverages (milk substitutes) allowed?                                                                 | 1                         |
| Are caloric sweeteners in non-dairy beverages (milk substitutes) allowed?                                                    | 1                         |
| Are non-caloric sweeteners in non-dairy beverages (milk substitutes) allowed?                                                | 1                         |
| Are artificial flavors or colors in non-dairy beverages (milk substitutes) allowed?                                          | 0.8374                    |
| Does the non-dairy beverage (milk substitutes) need to be nutritionally equivalent to fluid milk (e.g., fortified soy milk)? | 0.8851                    |
| Is there a beverage size specification for non-dairy beverage (milk substitutes)?                                            | 1                         |
| Is there a beverage size specification for non-dairy beverage (milk substitutes)? Text entry.                                | 1                         |
| Is there a caloric limit specified for non-dairy beverage (milk substitutes)?                                                | 1                         |
| Is there a caloric limit specified for non-dairy beverage (milk substitutes)? Text entry.                                    | 1                         |
| Is 100% fruit juice allowed?                                                                                                 | 1                         |

|                                                                   |                           |
|-------------------------------------------------------------------|---------------------------|
| Is 100% vegetable juice allowed?                                  | 1                         |
| Is a combination of fruit and vegetable juice allowed?            | 0.9203                    |
| Is juice combined with water (carbonated or not) allowed?         | 1                         |
| Are caloric sweeteners in juice allowed?                          | 1                         |
| Are non-caloric sweeteners in juice allowed?                      | 1                         |
| Are artificial flavors or colors in juice allowed?                | 1                         |
| Is there a beverage size specification for the juice?             | 0.913                     |
| Is there a beverage size specification for the juice? Text entry. | 1                         |
| Is there a caloric limit specified for the juice?                 | 1                         |
| Is there a caloric limit specified for the juice? Text entry.     | Insufficient observations |
| Were there any additional beverage types included?                | 1                         |
| Were there any additional beverage types included? Text entry.    | Insufficient observations |
| <b>Overall level of agreement</b>                                 | <b>0.9269</b>             |

---

<sup>a</sup> The kappa statistic, also known as the Cohen's kappa coefficient, measures the level of agreement between a pair of variables, taking into account agreement by chance, and is an indicator for interrater agreement.
